# Supplementary material
Source: PubMed Central journal article supplement (PMC6777399)

## Supplementary Online Content

Dossa F, Simpson AN, Sutradhar R, et al. Sex-based disparities in the hourly earnings of surgeons in the fee-for-service system in Ontario, Canada. *JAMA Surg*. Published online October 2, 2019. doi:10.1001/jamasurg.2019.3769

**eTable 1.** Differences in remuneration for similar gynecologic and urologic procedures based on the OHIP Schedule of Benefits. Monetary values are in Canadian dollars.

**eTable 2.** Data sources

**eTable 3.** Demonstration of overdispersion and underestimation of standard errors in the Poisson model for the primary outcome of the association between surgeon sex and hourly earnings. The Lagrange Multiplier Test was used to assess for overdispersion ( $p < 0.0001$ ).

**eTable 4.** Multivariable analysis of the association between surgeon gender and earnings per hour of operating time with surgical specialty included as a covariate

**eTable 5.** Multivariable analysis of the association between the proportion of female patients and earnings per hour. A surgery-level model was constructed using the 25 most commonly performed procedures among each specialty.

**eTable 6.** Multivariable analysis of the association between surgeon sex and procedure duration. Separate models were fit for each specialty to model the number of 15-minute time units billed for the 25 most common procedures performed by each specialty.

**eFigure 1.** Diagram of cohort creation.

**eFigure 2.** Histograms demonstrating distribution of propensity scores between male and female surgeons a) prior to propensity score matching; b) after propensity score matching. Similar distributions in propensity scores among male and female surgeons after matching confirmed appropriately balanced matched groups.

This supplementary material has been provided by the authors to give readers additional information about their work.

**eTable 1.** Differences in remuneration for similar gynecologic and urologic procedures based on the OHIP Schedule of Benefits. Monetary values are in Canadian dollars.

| <b>Sex</b> | <b>Procedure</b>                                              | <b>OHIP Code</b> | <b>Fee</b> | <b>Difference (female – male)</b> |
|------------|---------------------------------------------------------------|------------------|------------|-----------------------------------|
| Male       | Biopsy of penis                                               | Z702             | 23.55      | 27.35                             |
| Female     | Biopsy of vulva                                               | Z475             | 50.90      |                                   |
| Male       | Excision, penile condylomata                                  | Z767             | 78.60      | 36.50                             |
| Female     | Excision of vulvar condylomata                                | Z769             | 115.10     |                                   |
| Male       | Biopsy prostate                                               | Z712             | 85.45      | -51.40                            |
| Female     | Biopsy endometrium                                            | Z770             | 34.05      |                                   |
| Male       | Hypospadias one stage repair (with meatus but not into glans) | S578             | 287.75     | -163.80                           |
| Female     | Excision congenital vaginal septum                            | S702             | 123.70     |                                   |
| Male       | Resection of scrotum                                          | S618             | 215.80     | 41.25                             |
| Female     | Simple vulvectomy                                             | S703             | 257.05     |                                   |
| Male       | Drain prostate abscess                                        | Z713             | 92.10      | 0.20                              |
| Female     | Drain vaginal abscess                                         | Z728             | 92.30      |                                   |
| Male       | Excision hydrocele                                            | S611/S630        | 205.35     | -93.35                            |
| Female     | Excision bartholins gland                                     | S706             | 112.00     |                                   |
| Male       | Excision of sperm cord lesion                                 | S630/S631        | 205.35     | -93.35                            |
| Female     | Excision of Bartholins                                        | S706             | 112.00     |                                   |
| Male       | Penile amputation, partial                                    | S574             | 170.65     | 86.40                             |
| Female     | Simple vulvectomy                                             | S703             | 257.05     |                                   |
| Male       | Orchidectomy                                                  | S589             | 170.65     | 136.20                            |

|        |                                                           |           |         |         |
|--------|-----------------------------------------------------------|-----------|---------|---------|
| Female | Oophorectomy                                              | S745      | 306.85  |         |
| Male   | Radical orchidectomy for malignancy                       | S598      | 235.35  | 71.50   |
| Female | Oophorectomy                                              | S745      | 306.85  |         |
| Male   | Epididymectomy                                            | S602      | 170.65  | 136.20  |
| Female | Salpingectomy                                             | S738      | 306.85  |         |
| Male   | Vasectomy                                                 | S626      | 107.40  | 48.30   |
| Female | Tubal occlusion                                           | S741      | 155.70  |         |
| Male   | Retroperitoneal LN dissection for testicular tumor        | S590      | 834.25  | -36.80  |
| Female | Radical resection pelvic and para-aortic nodes for cancer | S750      | 797.45  |         |
| Male   | Reduce testis torsion                                     | S600      | 235.35  | -103.90 |
| Female | Reduce ovarian torsion (diagnostic laparoscopy)           | Z552      | 131.45  |         |
| Male   | Remove penis and LN                                       | S576      | 552.30  | -120.85 |
| Female | Radical vulvectomy                                        | S704      | 431.45  |         |
| Male   | Vasovasostomy                                             | S623      | 215.80  | 143.75  |
| Female | Salpingostomy                                             | S736      | 359.55  |         |
| Male   | TURP                                                      | S655      | 450.60  | -66.70  |
| Female | Hysteroscopic myomectomy                                  | S764      | 383.90  |         |
| Male   | Suprapubic/retropubic prostatectomy                       | S647/S650 | 600.75  | -137.75 |
| Female | TAH                                                       | S757      | 463.00  |         |
| Male   | Radical retropubic prostatectomy                          | S651      | 1008.35 | -114.80 |
| Female | Radical hysterectomy/TAH                                  | S763      | 893.55  |         |

|        |                                            |      |        |         |
|--------|--------------------------------------------|------|--------|---------|
| Male   | Perineal approach prostatectomy            | S645 | 574.60 | -111.60 |
| Female | Simple vaginal hysterectomy                | S816 | 463.00 |         |
|        |                                            |      |        |         |
| Male   | Perineal prostactectomy with vesiculectomy | S646 | 875.00 | 18.55   |
| Female | Radical vaginal hysterectomy               | S763 | 893.55 |         |

**eTable 2. Data Sources**

| Database                                                             | Description                                                                                                                                                                                                                  | Data elements extracted                                                                                                                                                                                                        |
|----------------------------------------------------------------------|------------------------------------------------------------------------------------------------------------------------------------------------------------------------------------------------------------------------------|--------------------------------------------------------------------------------------------------------------------------------------------------------------------------------------------------------------------------------|
| Ontario Health Insurance Plan database                               | Claims submitted for services rendered by physicians                                                                                                                                                                         | Date of procedure<br>Procedure type<br>Anesthesia time units billed<br>Reimbursement to surgeon<br>Patient age at the time of surgery<br>Patient sex<br>Patient comorbidities (American Society of Anesthesiologists category) |
| Canadian Institute of Health Information Discharge Abstract Database | In-patient hospitalization records. Reporting by all hospitals is mandatory. Patient demographics, clinical information, and administrative variables are included in the database, including diagnosis and procedure codes. | Procedure dates<br>Patient comorbidities                                                                                                                                                                                       |
| Same Day Surgery database                                            | Records of patients who underwent same-day procedures                                                                                                                                                                        | Procedure dates<br>Patient comorbidities                                                                                                                                                                                       |
| Corporate Provider Database                                          | Demographics and practice-related data for surgeons                                                                                                                                                                          | Surgeon demographics (age, sex, years in practice)<br>Surgeon specialty                                                                                                                                                        |
| Registered Persons Database                                          | Vital statistics registry                                                                                                                                                                                                    | Patient age at time of surgery                                                                                                                                                                                                 |

Patient comorbidities were captured through the Canadian Institute of Health Information Discharge Abstract Database, the Same Day Surgery database, and the Ontario Health Insurance Plan database

**eTable 3.** Demonstration of overdispersion and underestimation of standard errors in the Poisson model for the primary outcome of the association between surgeon sex and hourly earnings. The Lagrange Multiplier Test was used to assess for overdispersion ( $p < 0.0001$ ).

| <b>Covariate</b>                 | <b>Point Estimate</b> | <b>Lower Confidence Limit</b> | <b>Upper Confidence Limit</b> | <b>p-value</b> |
|----------------------------------|-----------------------|-------------------------------|-------------------------------|----------------|
| <i>Surgeon sex</i>               |                       |                               |                               |                |
| Poisson                          | 0.7607                | 0.7605                        | 0.7609                        | <0.0001        |
| Negative Binomial                | 0.7626                | 0.7366                        | 0.7895                        | <0.0001        |
| <i>Surgeon years in practice</i> |                       |                               |                               |                |
| Poisson                          | 0.9982                | 0.9982                        | 0.9982                        | <0.0001        |
| Negative Binomial                | 0.9996                | 0.9983                        | 1.0009                        | 0.5274         |
| <i>Hospital type</i>             |                       |                               |                               |                |
| Poisson                          | 1.0096                | 1.0094                        | 1.0097                        | <0.0001        |
| Negative Binomial                | 1.0125                | 0.9831                        | 1.0427                        | 0.4095         |
| <i>Average patient age</i>       |                       |                               |                               |                |
| Poisson                          | 1.0037                | 1.0037                        | 1.0037                        | <0.0001        |
| Negative Binomial                | 1.0092                | 1.0076                        | 1.0108                        | <0.0001        |
| <i>High ADGs</i>                 |                       |                               |                               |                |
| Poisson                          | 1.6693                | 1.6674                        | 1.6712                        | <0.0001        |
| Negative Binomial                | 1.0039                | 0.8907                        | 1.1316                        | 0.9486         |
| <i>High ASA</i>                  |                       |                               |                               |                |
| Poisson                          | 1.5021                | 1.5012                        | 1.5029                        | <0.0001        |
| Negative Binomial                | 1.5283                | 1.4220                        | 1.6424                        | <0.0001        |
| <i>Obesity</i>                   |                       |                               |                               |                |
| Poisson                          | 1.1810                | 1.1798                        | 1.1823                        | <0.0001        |
| Negative Binomial                | 0.8724                | 0.7120                        | 1.0689                        | 0.1674         |
| <i>Marginalization</i>           |                       |                               |                               |                |
| Poisson                          | 0.8797                | 0.8794                        | 0.8801                        | <0.0001        |
| Negative Binomial                | 0.9573                | 0.9078                        | 1.0095                        | 0.1069         |

**eTable 4.** Multivariable analysis of the association between surgeon gender and earnings per hour of operating time with surgical specialty included as a covariate

|                                      | <i>Adjusted RR</i> | <i>95% Confidence Interval</i> | <i>p-value</i> |
|--------------------------------------|--------------------|--------------------------------|----------------|
| Surgeon gender                       |                    |                                |                |
| Male                                 | Reference          | -                              | -              |
| Female                               | 0.86               | 0.83 – 0.89                    | <0.0001        |
| Surgeon years in practice            | 1.00               | 1.00 – 1.00                    | 0.33           |
| Specialty                            |                    |                                |                |
| General surgery                      | Reference          | -                              | -              |
| Neurosurgery                         | 1.90               | 1.75 – 2.08                    | <0.0001        |
| Orthopedic surgery                   | 1.25               | 1.21 – 1.30                    | <0.0001        |
| Plastic surgery                      | 1.08               | 1.02 – 1.14                    | 0.01           |
| Cardiothoracic surgery               | 1.27               | 1.18 – 1.37                    | <0.0001        |
| Gynecology                           | 0.84               | 0.80 – 0.87                    | <0.0001        |
| Ophthalmology                        | 1.84               | 1.74 – 1.95                    | <0.0001        |
| Otolaryngology                       | 1.22               | 1.16 – 1.29                    | <0.0001        |
| Urology                              | 0.98               | 0.93 – 1.04                    | 0.52           |
| Hospital type                        |                    |                                |                |
| Teaching                             | Reference          | -                              | -              |
| Non-teaching                         | 1.08               | 1.05 – 1.10                    | <0.0001        |
| Patient age <sup>†</sup>             | 1.00               | 1.00 – 1.00                    | 0.23           |
| Proportion of patients with ADG ≥10  | 0.87               | 0.79 – 0.97                    | 0.01           |
| Proportion of patients with ASA ≥III | 1.68               | 1.54 – 1.83                    | <0.0001        |
| Proportion of patients with BMI >40  | 1.36               | 1.11 – 1.65                    | 0.002          |
| Marginalization <sup>†</sup>         | 0.97               | 0.92 – 1.01                    | 0.14           |

ADG = aggregated diagnosis group; BMI = body mass index; ASA = American Society of Anesthesiologists

<sup>†</sup>Modelled as average values for each surgeon based on all operations performed across the study period

**eTable 5. Multivariable analysis of the association between the proportion of female patients and earnings per hour.** A surgery-level model was constructed using the 25 most commonly performed procedures among each specialty.

|                                                          | <i>Adjusted RR (95%CI)</i> | <i>p-value</i> |
|----------------------------------------------------------|----------------------------|----------------|
| Proportion of female patients                            | 1.06 (0.87-1.29)           | 0.58           |
| Average patient age                                      | 1.01 (1.00-1.02)           | 0.003          |
| Proportion of patients with ADG $\geq 10$                | 0.44 (0.23-0.82)           | 0.01           |
| Proportion of patients with ASA $\geq III$               | 1.27 (0.96-1.68)           | 0.10           |
| Proportion of patients with BMI $>40$                    | 1.49 (0.73-3.02)           | 0.27           |
| Average marginalization                                  | 1.75 (0.91-3.37)           | 0.09           |
| Proportion of procedures performed at teaching hospitals | 2.30 (1.80-2.93)           | $<0.0001$      |
| Average surgeon years in practice                        | 0.99 (0.98-1.01)           | 0.24           |

RR = rate ratio; CI = confidence interval; ADG = aggregated diagnosis group; BMI = body mass index ( $\text{kg}/\text{m}^2$ ); ASA = American Society of Anesthesiologists



**eTable 6. Multivariable analysis of the association between surgeon sex and procedure duration.** Separate models were fit for each specialty to model the number of 15-minute time units billed for the 25 most common procedures performed by each specialty.

| <b>Specialty</b>       | <b>Duration of procedure, RR (95% CI)</b> | <b>p-value</b> |
|------------------------|-------------------------------------------|----------------|
| General surgery        | 1.02 (0.96-1.07)                          | 0.55           |
| Neurosurgery           | 0.93 (0.79-1.08)                          | 0.32           |
| Orthopedic surgery     | 1.04 (0.97-1.11)                          | 0.30           |
| Plastic surgery        | 1.07 (1.02-1.13)                          | 0.008          |
| Cardiothoracic surgery | 0.98 (0.91-1.05)                          | 0.53           |
| Gynecology             | 1.03 (0.98-1.07)                          | 0.30           |
| Ophthalmology          | 1.08 (0.97-1.21)                          | 0.15           |
| Otolaryngology         | 0.99 (0.92-1.06)                          | 0.70           |
| Urology                | 0.90 (0.80-1.00)                          | 0.06           |

RR: rate ratio; CI: confidence interval

All models adjusted for hospital type (teaching vs. non-teaching), surgeon age, patient age, patient sex, obesity (BMI >40), ADG (≥10), ASA category (≥III), and marginalization score; clustering by procedure performed

**eFigure 1. Diagram of cohort creation**

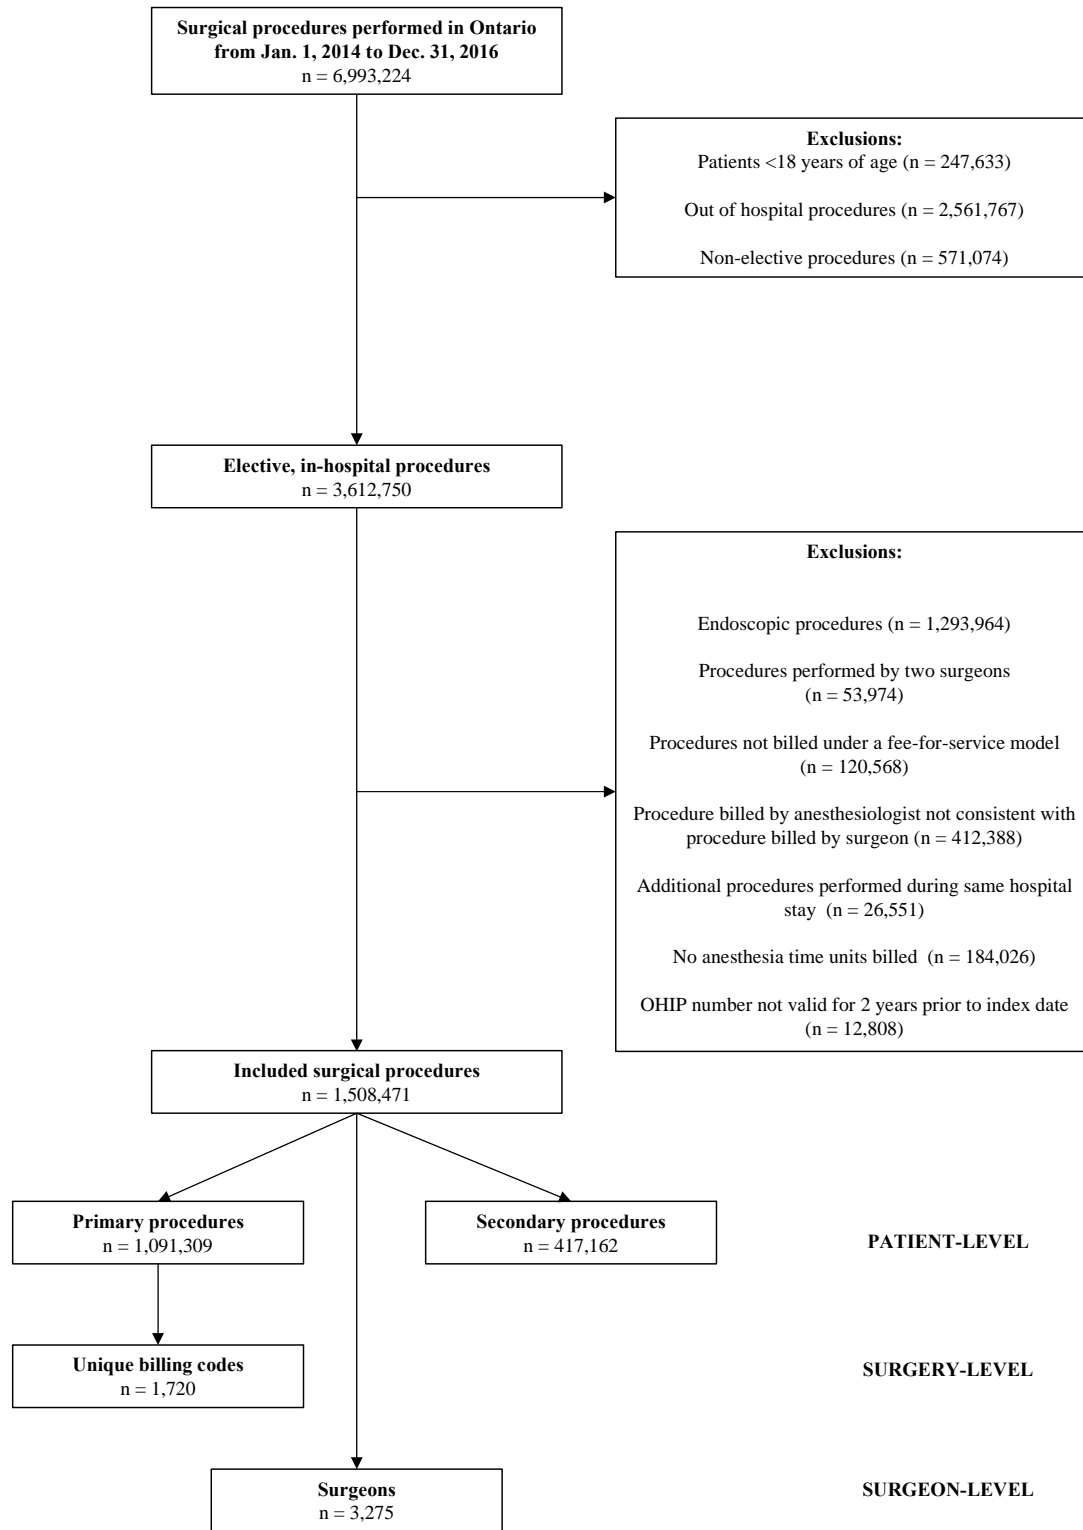

**eFigure 2. Histograms demonstrating distribution of propensity scores between male and female surgeons a) prior to propensity score matching; b) after propensity score matching.** Similar distributions in propensity scores among male and female surgeons after matching confirmed appropriately balanced matched groups.

a) Prior to matching

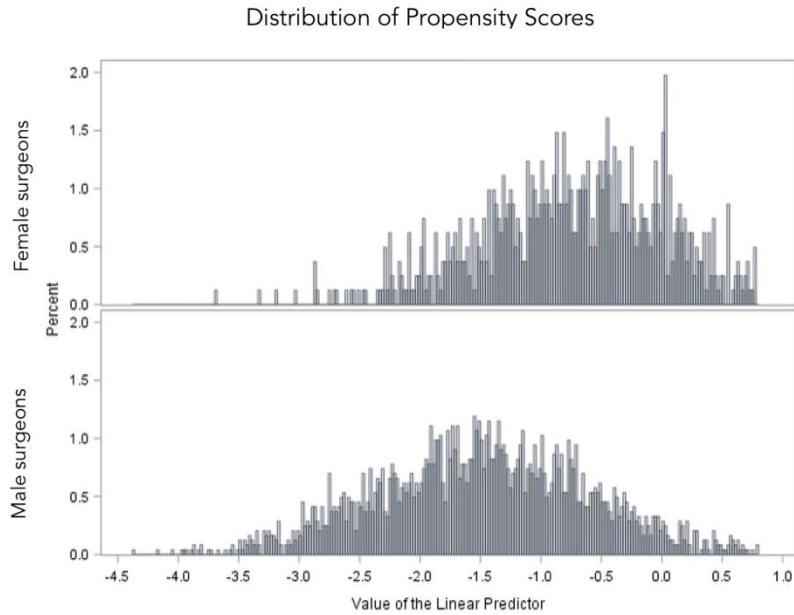

b) After matching

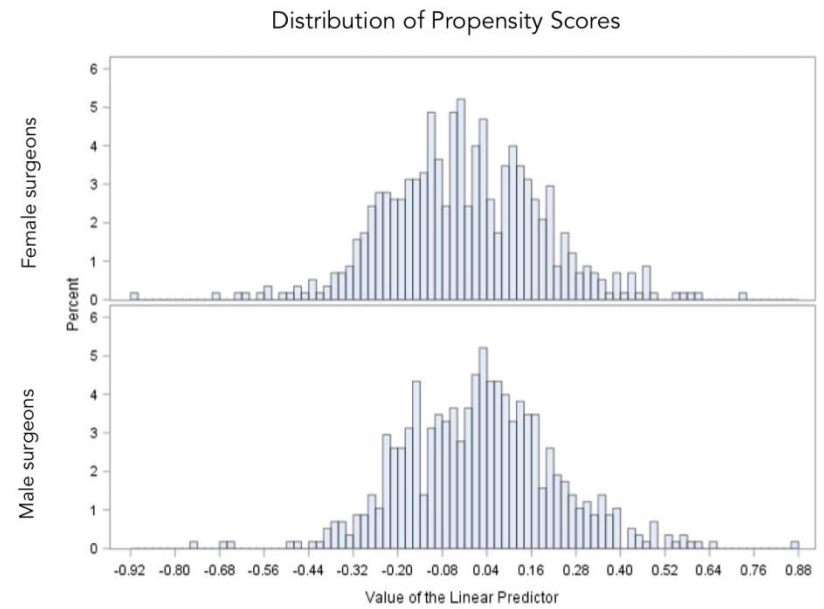

Supplement: jamasurg-154-1134-s001.pdf [file jamasurg-154-1134-s001.pdf]
